# Supplementary material for: Evaluation of soil contamination in intensive agricultural areas by pesticides and organic pollutants: south-eastern Spain as a case study
Source: Royal Society of Chemistry journal article supplement (doi:10.1039/c2em10993j), 2012-01-01
Supplement: c2em10993j.pdf [file c2em10993j.pdf]

## **ELECTRONIC SUPPLEMENTARY MATERIAL to the paper entitled:**

### **Evaluation of soil contamination in intensive agricultural areas by pesticides and organic pollutants: south-eastern Spain as case of study**

Patricia Plaza-Bolaños<sup>a,b</sup>, Juan Antonio Padilla-Sánchez<sup>a</sup>, Antonia Garrido-Frenich<sup>a,\*</sup>,  
Roberto Romero-González<sup>a</sup>, José Luis Martínez-Vidal<sup>a</sup>

<sup>a</sup>*Department of Hydrogeology and Analytical Chemistry, Andalusian Center for the Assessment and Monitoring of Global Change, CAESCG, Agrifood Campus of International Excellence, ceiA3, University of Almería, Carretera de Sacramento s/n, E-04120, Almería, Spain*

<sup>b</sup>*Department of Analytical Chemistry, University of Granada, E-18071, Granada, Spain*

\* To whom correspondence should be addressed. E-mail: [agarrido@ual.es](mailto:agarrido@ual.es)

This document provides more detailed information to the main paper mentioned above. The following information is included:

| Content                                                                                                                                                                              | Page |
|--------------------------------------------------------------------------------------------------------------------------------------------------------------------------------------|------|
| <b>Table S1</b> Selected compounds evaluated in this survey and limits of quantification                                                                                             | 2    |
| <b>Table S2</b> Summary of the analytical methods applied for the analysis of residues and contaminants                                                                              | 4    |
| <b>Figure S1</b> Ratios observed for the main endosulfan transformation products (TPs) in the studied agricultural soils                                                             | 5    |
| <b>Figure S2</b> Contamination pattern of residues and contaminants studied in the different municipalities: (a) Adra; (b) El Ejido; (c) Roquetas de Mar; (d) La Mojonera; (e) Vicar | 6    |
| Apparatus, instruments, solvents and reference standard                                                                                                                              | 7    |
| Quality control (IQC)                                                                                                                                                                | 9    |

**Table S1** Selected compounds evaluated in this survey and limits of quantification (LOQs)

| Compound              | Description     | Listed in                            | LOQ                   | Compound           | Description | Listed in | LOQ                   | Compound                      | Descripti | Listed in               | LOQ                   |
|-----------------------|-----------------|--------------------------------------|-----------------------|--------------------|-------------|-----------|-----------------------|-------------------------------|-----------|-------------------------|-----------------------|
| <b>Pesticides</b>     |                 |                                      |                       | Metazachlor        | HB          |           | 3 µg kg <sup>-1</sup> | PCB 77                        | IP        | POPs                    | 2 µg kg <sup>-1</sup> |
| 2-Phenylphenol        | FUNG            |                                      | 3 µg kg <sup>-1</sup> | Metobromuron       | HB          |           | 3 µg kg <sup>-1</sup> | PCB 81                        | IP        | POPs                    | 2 µg kg <sup>-1</sup> |
| Alachlor              | HB              |                                      | 3 µg kg <sup>-1</sup> | Metolachlor        | HB          |           | 3 µg kg <sup>-1</sup> | PCB 101                       | IP        | POPs, EPA               | 2 µg kg <sup>-1</sup> |
| Aldrin                | INS             | EPA <sup>a</sup> , POPs <sup>b</sup> | 3 µg kg <sup>-1</sup> | Metoxuron          | HB          |           | 3 µg kg <sup>-1</sup> | PCB 105                       | IP        | POPs                    | 2 µg kg <sup>-1</sup> |
| Atrazine              | HB              |                                      | 3 µg kg <sup>-1</sup> | Metribucin         | HB          |           | 3 µg kg <sup>-1</sup> | PCB 114                       | IP        | POPs                    | 2 µg kg <sup>-1</sup> |
| Atrazine desethyl     | TP              |                                      | 3 µg kg <sup>-1</sup> | Mirex              | INS         | POPs      | 3 µg kg <sup>-1</sup> | PCB 118                       | IP        | POPs                    | 2 µg kg <sup>-1</sup> |
| Atrazine desisopropyl | TP              |                                      | 3 µg kg <sup>-1</sup> | Monolinuron        | HB          |           | 3 µg kg <sup>-1</sup> | PCB 121                       | IP        | POPs                    | 2 µg kg <sup>-1</sup> |
| Azinphos ethyl        | INS/ACA         |                                      | 3 µg kg <sup>-1</sup> | Norflurazon        | HB          |           | 3 µg kg <sup>-1</sup> | PCB 123                       | IP        | POPs                    | 2 µg kg <sup>-1</sup> |
| Bifenthrin            | INS/ACA         |                                      | 3 µg kg <sup>-1</sup> | <i>o,p</i> -DDD    | TP          |           | 3 µg kg <sup>-1</sup> | PCB 126                       | IP        | POPs                    | 2 µg kg <sup>-1</sup> |
| Bromophos ethyl       | INS             |                                      | 3 µg kg <sup>-1</sup> | <i>o,p</i> -DDT    | INS         | POPs      | 3 µg kg <sup>-1</sup> | PCB 128                       | IP        | POPs                    | 2 µg kg <sup>-1</sup> |
| Bromophos methyl      | INS             |                                      | 3 µg kg <sup>-1</sup> | Oxadixil           | FUNG        |           | 3 µg kg <sup>-1</sup> | PCB136                        | IP        | POPs                    | 2 µg kg <sup>-1</sup> |
| Bromopropilate        | ACA             |                                      | 3 µg kg <sup>-1</sup> | <i>p,p'</i> -DDD   | TP          | EPA       | 3 µg kg <sup>-1</sup> | PCB137                        | IP        | POPs                    | 2 µg kg <sup>-1</sup> |
| Bupirimate            | FUNG            |                                      | 3 µg kg <sup>-1</sup> | <i>p,p'</i> -DDE   | TP          | EPA       | 3 µg kg <sup>-1</sup> | PCB 138                       | IP        | POPs, EPA               | 2 µg kg <sup>-1</sup> |
| Carbophenothion       | INS/ACA         |                                      | 3 µg kg <sup>-1</sup> | Parathion ethyl    | INS/ACA     |           | 3 µg kg <sup>-1</sup> | PCB 143                       | IP        | POPs                    | 2 µg kg <sup>-1</sup> |
| Clodinafop propargyl  | HB              |                                      | 3 µg kg <sup>-1</sup> | Parathion methyl   | INS/ACA     |           | 3 µg kg <sup>-1</sup> | PCB 153                       | IP        | POPs, EPA               | 2 µg kg <sup>-1</sup> |
| Chloridazone          | HB              |                                      | 3 µg kg <sup>-1</sup> | Penconazole        | FUNG        |           | 3 µg kg <sup>-1</sup> | PCB 156                       | IP        | POPs                    | 2 µg kg <sup>-1</sup> |
| Chlormephos           | INS             |                                      | 3 µg kg <sup>-1</sup> | Pendimethalin      | HB          |           | 3 µg kg <sup>-1</sup> | PCB 157                       | IP        | POPs                    | 2 µg kg <sup>-1</sup> |
| Chloropropylate       | ACA             |                                      | 3 µg kg <sup>-1</sup> | Pentachlorobenzene | FUNG        | POPs      | 3 µg kg <sup>-1</sup> | PCB 167                       | IP        | POPs                    | 2 µg kg <sup>-1</sup> |
| Chlorphenson          | INS             |                                      | 3 µg kg <sup>-1</sup> | Phentoate          | INS/ACA     |           | 3 µg kg <sup>-1</sup> | PCB 169                       | IP        | POPs                    | 2 µg kg <sup>-1</sup> |
| Chlorphenvinphos      | INS/ACA         |                                      | 3 µg kg <sup>-1</sup> | Pyridaben          | INS/ACA     |           | 3 µg kg <sup>-1</sup> | PCB 170                       | IP        | POPs                    | 2 µg kg <sup>-1</sup> |
| Chlorpyriphos methyl  | INS/ACA         |                                      | 3 µg kg <sup>-1</sup> | Pirifenox          | FUNG        |           | 3 µg kg <sup>-1</sup> | PCB 180                       | IP        | POPs, EPA               | 2 µg kg <sup>-1</sup> |
| Chlortal dimethyl     | HB              |                                      | 3 µg kg <sup>-1</sup> | Pirimicarb         | INS         |           | 3 µg kg <sup>-1</sup> | PCB 185                       | IP        | POPs                    | 2 µg kg <sup>-1</sup> |
| Chlortion             | INS             |                                      | 3 µg kg <sup>-1</sup> | Pirimiphos ethyl   | INS         |           | 3 µg kg <sup>-1</sup> | PCB 189                       | IP        | POPs                    | 2 µg kg <sup>-1</sup> |
| Chlortoluron          | HB              |                                      | 3 µg kg <sup>-1</sup> | Pirimiphos methyl  | INS/ACA     |           | 3 µg kg <sup>-1</sup> | PCB 194                       | IP        | POPs                    | 2 µg kg <sup>-1</sup> |
| Cyanophenphos         | INS             |                                      | 3 µg kg <sup>-1</sup> | Piriproxifen       | INS         |           | 3 µg kg <sup>-1</sup> | PCB 206                       | IP        | POPs                    | 2 µg kg <sup>-1</sup> |
| Cyproconazole         | FUNG            |                                      | 3 µg kg <sup>-1</sup> | Procymidone        | FUNG        |           | 3 µg kg <sup>-1</sup> | PCB 209                       | IP        | POPs                    | 2 µg kg <sup>-1</sup> |
| Diazinon              | INS/ACA         |                                      | 3 µg kg <sup>-1</sup> | Propachlor         | HB          |           | 3 µg kg <sup>-1</sup> | <b>PAHs</b>                   |           |                         |                       |
| Dichlobenil           | HB              |                                      | 3 µg kg <sup>-1</sup> | Propazine          | HB          |           | 3 µg kg <sup>-1</sup> | Acenaphthene                  | UB        | EPA                     | 2 µg kg <sup>-1</sup> |
| Dichloran             | FUNG            |                                      | 3 µg kg <sup>-1</sup> | Propiconazole      | FUNG        |           | 3 µg kg <sup>-1</sup> | Acenaphthylene                | UB        | EPA                     | 2 µg kg <sup>-1</sup> |
| Dieldrin              | INS             | EPA, POPs                            | 3 µg kg <sup>-1</sup> | Propizamide        | HB          |           | 3 µg kg <sup>-1</sup> | Anthracene                    | UB        | EPA                     | 2 µg kg <sup>-1</sup> |
| Diethofencarb         | FUNG            |                                      | 3 µg kg <sup>-1</sup> | Prometrine         | HB          |           | 3 µg kg <sup>-1</sup> | Benz[ <i>a</i> ]anthracene    | UB        | EPA, REACH <sup>c</sup> | 2 µg kg <sup>-1</sup> |
| Difeconazole          | FUNG            |                                      | 3 µg kg <sup>-1</sup> | Propoxur           | INS         |           | 3 µg kg <sup>-1</sup> | Benzo[ <i>a</i> ]pyrene       | UB        | REACH                   | 2 µg kg <sup>-1</sup> |
| Dimetomorph           | FUNG            |                                      | 3 µg kg <sup>-1</sup> | Pyrazophos         | FUNG        |           | 3 µg kg <sup>-1</sup> | Benzo[ <i>b</i> ]fluoranthene | UB        | EPA, REACH              | 2 µg kg <sup>-1</sup> |
| Diniconazole          | FUNG            |                                      | 3 µg kg <sup>-1</sup> | Quinalphos         | INS/ACA     |           | 3 µg kg <sup>-1</sup> | Benzo[ <i>k</i> ]fluoranthene | UB        | REACH                   | 2 µg kg <sup>-1</sup> |
| Diuron                | HB              |                                      | 3 µg kg <sup>-1</sup> | Quinoxifen         | FUNG        |           | 3 µg kg <sup>-1</sup> | Benzo[ <i>ghi</i> ]perylene   | UB        |                         | 2 µg kg <sup>-1</sup> |
| Endosulfan $\alpha$   | INS             | EPA                                  | 3 µg kg <sup>-1</sup> | Quintocene         | FUNG        |           | 3 µg kg <sup>-1</sup> | Benzo[ <i>j</i> ]fluoranthene | UB        | REACH                   | 2 µg kg <sup>-1</sup> |
| Endosulfan $\beta$    | TP              | EPA                                  | 3 µg kg <sup>-1</sup> | S421               | INS         |           | 3 µg kg <sup>-1</sup> | 2-Bromonaphthylene            | UB        |                         | 2 µg kg <sup>-1</sup> |
| Endosulfan eter       | TP <sup>a</sup> |                                      | 3 µg kg <sup>-1</sup> | Sebutylazine       | HB          |           | 3 µg kg <sup>-1</sup> | Chrysene                      | UB        | EPA, REACH              | 2 µg kg <sup>-1</sup> |

|                    |         |           |                        |                        |         |                        |                                 |       |            |                         |
|--------------------|---------|-----------|------------------------|------------------------|---------|------------------------|---------------------------------|-------|------------|-------------------------|
| Endosulfan suphate | TP      | EPA       | 3 µg kg <sup>-1</sup>  | Silafluofen            | INS     | 3 µg kg <sup>-1</sup>  | Cyclopenta[ <i>cd</i> ]pyrene   | UB    |            | 2 µg kg <sup>-1</sup>   |
| EPN                | INS/ACA |           | 3 µg kg <sup>-1</sup>  | Simazine               | HB      | 3 µg kg <sup>-1</sup>  | Dibenzo[ <i>a,e</i> ]pyrene     | UB    |            | 2 µg kg <sup>-1</sup>   |
| Ethion             | INS/ACA |           | 3 µg kg <sup>-1</sup>  | Sulfotep               | INS/ACA | 3 µg kg <sup>-1</sup>  | Dibenzo[ <i>a,h</i> ]anthracene | UB    | EPA, REACH | 3 µg kg <sup>-1</sup>   |
| Etofumesate        | HB      |           | 3 µg kg <sup>-1</sup>  | Tau fluvalinate        | INS/ACA | 3 µg kg <sup>-1</sup>  | Dibenzo[ <i>a,h</i> ]pyrene     | UB    |            | 3 µg kg <sup>-1</sup>   |
| Etoprophos         | INS /NM |           | 3 µg kg <sup>-1</sup>  | Tebufenpirad           | ACA     | 3 µg kg <sup>-1</sup>  | Dibenzo[ <i>a,i</i> ]pyrene     | UB    |            | 3 µg kg <sup>-1</sup>   |
| Etrimphos          | INS     |           | 3 µg kg <sup>-1</sup>  | Tebutam                | HB      | 3 µg kg <sup>-1</sup>  | Dibenzo[ <i>a,l</i> ]pyrene     | UB    |            | 3 µg kg <sup>-1</sup>   |
| Fenamiphos         | NM      |           | 3 µg kg <sup>-1</sup>  | Tecnacene              | FUNG    | 3 µg kg <sup>-1</sup>  | Fluoranthene                    | UB    | EPA        | 3 µg kg <sup>-1</sup>   |
| Fenitrothion       | INS     |           | 3 µg kg <sup>-1</sup>  | Terbumetrone           | HB      | 3 µg kg <sup>-1</sup>  | Fluorene                        | UB    | EPA        | 3 µg kg <sup>-1</sup>   |
| Fenoxaprop-P-ethyl |         |           | 3 µg kg <sup>-1</sup>  | Terbuthrin             | HB      | 3 µg kg <sup>-1</sup>  | Indeno[1,2,3- <i>cd</i> ]pyrene | UB    | EPA        | 3 µg kg <sup>-1</sup>   |
| Fenpropathrin      | INS/ACA |           | 3 µg kg <sup>-1</sup>  | Terbutylazine          | HB      | 3 µg kg <sup>-1</sup>  | 5-Methylchrysene                | UB    |            | 3 µg kg <sup>-1</sup>   |
| Feranimol          | FUNG    |           | 3 µg kg <sup>-1</sup>  | Terbutylazine desethyl | TP      | 3 µg kg <sup>-1</sup>  | Naphthalene                     | UB    | EPA        | 3 µg kg <sup>-1</sup>   |
| Fipronil           | INS     |           | 3 µg kg <sup>-1</sup>  | Tepraloxidim           | HB      | 10 µg kg <sup>-1</sup> | Phenanthrene                    | UB    | EPA        | 3 µg kg <sup>-1</sup>   |
| Flucythrinate      | INS     |           | 3 µg kg <sup>-1</sup>  | Tetraconazole          | FUNG    | 3 µg kg <sup>-1</sup>  | Pyrene                          | UB    | EPA        | 3 µg kg <sup>-1</sup>   |
| Fluchlorhidrone    | HB      |           | 3 µg kg <sup>-1</sup>  | Tetradiphon            | ACA     | 3 µg kg <sup>-1</sup>  | <b>Phenolic compounds</b>       |       |            |                         |
| Fludioxonil        | FUNG    |           | 3 µg kg <sup>-1</sup>  | Tetramethrin           | INS     | 3 µg kg <sup>-1</sup>  | 2,4,5-Trichlorophenol           | IP/TP |            | 10 µg kg <sup>-1</sup>  |
| Fonofos            | INS     |           | 3 µg kg <sup>-1</sup>  | Tiazopir               | HB      | 3 µg kg <sup>-1</sup>  | 2,4,6-Trichlorophenol           | IP/TP | EPA        | 10 µg kg <sup>-1</sup>  |
| Heptachlor         | INS     | EPA, POPs | 3 µg kg <sup>-1</sup>  | Tolcophos methyl       | FUNG    | 3 µg kg <sup>-1</sup>  | 2,4-Dimethylphenol              | IP/TP | EPA        | 10 µg kg <sup>-1</sup>  |
| Hexachlorbencene   | FUNG    | EPA, POPs | 3 µg kg <sup>-1</sup>  | Transfluthrin          | INS     | 3 µg kg <sup>-1</sup>  | 4-Chloro-3-methylphenol         | IP/TP |            | 50 µg kg <sup>-1</sup>  |
| Imidacloprid       | INS     |           | 3 µg kg <sup>-1</sup>  | Triadimephon           | FUNG    | 3 µg kg <sup>-1</sup>  | 2,4-Dichlorophenol              | IP/TP | EPA        | 10 µg kg <sup>-1</sup>  |
| Isophenphos        | INS     |           | 3 µg kg <sup>-1</sup>  | Vinclozolin            | FUNG    | 3 µg kg <sup>-1</sup>  | 2-Chlorophenol                  | IP/TP | EPA        | 5 µg kg <sup>-1</sup>   |
| Isoproturon        | HB      |           | 10 µg kg <sup>-1</sup> | <b>PCBs</b>            |         |                        | 4-Chlorophenol                  | IP/TP |            | 5 µg kg <sup>-1</sup>   |
| Kresosin methyl    | FUNG    |           | 3 µg kg <sup>-1</sup>  | PCB 5                  | IP      | POPs                   | 2-Nitrophenol                   | IP/TP | EPA        | 50 µg kg <sup>-1</sup>  |
| α-Lindane          | INS     | EPA, POPs | 3 µg kg <sup>-1</sup>  | PCB 11                 | IP      | POPs                   | 3-Nitrophenol                   | IP/TP |            | 100 µg kg <sup>-1</sup> |
| β-Lindane          | INS     | EPA, POPs | 3 µg kg <sup>-1</sup>  | PCB 18                 | IP      | POPs                   | 4-Nitrophenol                   | IP/TP | EPA        | 100 µg kg <sup>-1</sup> |
| δ-Lindane          | INS     | EPA       | 3 µg kg <sup>-1</sup>  | PCB 28                 | IP      | POPs, EPA              | 4-n-Nonylphenol                 | IP/TP | REACH      | 5 µg kg <sup>-1</sup>   |
| γ-Lindane          | INS     | EPA, POPs | 3 µg kg <sup>-1</sup>  | PCB29                  | IP      | POPs                   | Pentachlorophenol               | IP/TP | EPA, REACH | 1 µg kg <sup>-1</sup>   |
| Lenacilo           | HB      |           | 3 µg kg <sup>-1</sup>  | PCB 31                 | IP      | POPs                   | 4-Tertoctylphenol               | IP/TP |            | 5 µg kg <sup>-1</sup>   |
| Linuron            | HB      |           | 3 µg kg <sup>-1</sup>  | PCB 44                 | IP      | POPs                   | <b>Phthalates</b>               |       |            |                         |
| Malathion          | INS/ACA |           | 3 µg kg <sup>-1</sup>  | PCB 47                 | IP      | POPs                   | DEHP                            | UB    | EPA, REACH | 50 µg kg <sup>-1</sup>  |
| Metalaxyl          | FUNG    |           | 3 µg kg <sup>-1</sup>  | PCB 52                 | IP      | POPs, EPA              |                                 |       |            |                         |
| Metamitrone        | HB      |           | 3 µg kg <sup>-1</sup>  | PCB 66                 | IP      | POPs                   |                                 |       |            |                         |

<sup>a</sup>List of the 129 priority pollutants by United States Environmental Protection Agency (U.S. EPA). Appendix A to part 423 (available on <http://www.epa.gov/waterscience/methods/pollutants.htm>, last accessed December 2011)

<sup>b</sup>Stockholm Convention Persistent Organic Pollutants, Secretary-General of the United Nations, 22 May 2001. <http://www.pops.int>. (Last acceded December 2010)

<sup>c</sup>E.P. Council, Regulation (EC) No 1907/2006 of the European Parliament and of the Council of 18 December 2006 concerning the Registration, Evaluation, Authorisation and Restriction of Chemicals (REACH), establishing a European Chemicals Agency, amending Directive 1999/45/EC and repealing Council Regulation (EEC) No 793/93 and Commission Regulation (EC) No 1488/94 as well as Council Directive 76/769/EEC and Commission Directives 91/155/EEC, 93/67/EEC, 93/105/EC and 2000/21/EC, Off. J. Eur. Union (2006) 850

Abbreviations: ACA: Acaricide; FUNG: Fungicide; HB: Herbicide; IN: Industrial product; INS: Insecticide; NEM: Nematicide; TP: Transformation product; UB: Ubiquitous contaminant

**Table S2** Summary of the analytical methods applied for the analysis of residues and contaminants.

| Compound                       | Extraction method                                                                                                        | Determination technique                               | Injection                                                                                      | Column                                                                                                                                                         | Program                                                                                                                                                                                                                                                                                                                                             | Analyzer | Parameters                                                                                                                                                                                                                                                                                       | Recovery (%) | Precision <sup>b</sup>             | Ref. |
|--------------------------------|--------------------------------------------------------------------------------------------------------------------------|-------------------------------------------------------|------------------------------------------------------------------------------------------------|----------------------------------------------------------------------------------------------------------------------------------------------------------------|-----------------------------------------------------------------------------------------------------------------------------------------------------------------------------------------------------------------------------------------------------------------------------------------------------------------------------------------------------|----------|--------------------------------------------------------------------------------------------------------------------------------------------------------------------------------------------------------------------------------------------------------------------------------------------------|--------------|------------------------------------|------|
| Polar and non-polar pesticides | PLE (AcOEt/MeOH, 3:1 v/v, 75 °C)                                                                                         | UHPLC (Polar pesticides)<br>GC (non-polar pesticides) | <b>Polar pesticides:</b><br>5 µL<br><b>Non-polar pesticides:</b><br>10 µL, LVI+PTV (Carbofrit) | <b>Polar pesticides:</b><br>C <sub>18</sub><br>(100mm×2.1mm,1.7µm)<br><b>Non-polar pesticides:</b><br>Varian FactorFour<br>VF-5ms<br>(30 m × 0.25 mm × 0.25µm) | <b>Polar pesticides:</b><br>A (MeOH), B (Water, 0.01% HCOOH)<br>10% A→90% (5 min, kept 2 min)→25% A (over 1.5 min), flow (0.35 ml/min), column (35 °C)<br><b>Non-polar pesticides:</b><br>70 °C (0.5 min)→310 °C (100 °C min <sup>-1</sup> , 10 min)<br>70 °C (3.5 min) →180 °C (35 °C min <sup>-1</sup> )→300 °C (10 °C min <sup>-1</sup> , 7 min) | QqQ      | <b>Polar pesticides:</b><br>ESI+, capillary (3.5 kV), extractor (5 V), source (110 °C), desolvation (350 °C), cone gas (80 L h <sup>-1</sup> ), desolvation gas (600 L h <sup>-1</sup> )<br><b>Non-polar pesticides:</b><br>EI (70eV), transfer line (300 °C), manifold (40 °C), source (280 °C) | 72-121       | Intra-day: < 27<br>Inter-day: < 36 | (1)  |
| PAHs and PCBs                  | PLE (acetone/hexane, 1:1, v/v, 125 °C)                                                                                   | GC                                                    | 10 µL, LVI+PTV (Carbofrit)                                                                     | Varian FactorFour<br>VF-5ms<br>(30 m × 0.25 mm × 0.25µm)                                                                                                       | 70 °C (4 min)→300 °C (20°C min <sup>-1</sup> , 15 min)<br>70 °C (0.4 min) →325 °C (200 °C min <sup>-1</sup> , 28 min)                                                                                                                                                                                                                               | QqQ      | EI (70eV), transfer line (300 °C), manifold (40 °C), source (280 °C)                                                                                                                                                                                                                             | 49-110       | Intra-day: < 16<br>Inter-day: < 23 | (4)  |
| Phenols                        | QuEChERS method: SLE (ACN); vortex; induced partition (MgSO <sub>4</sub> + CH <sub>3</sub> COONa + NaCl); centrifugation | GC                                                    | 10 µL, LVI+PTV                                                                                 | Varian FactorFour<br>VF-5ms<br>(30 m × 0.25 mm × 0.25 µm)                                                                                                      | 70 °C (0.5 min)→310 °C (100 °C min <sup>-1</sup> , 10 min)<br>70 °C (3.5 min) →300 °C (20 °C min <sup>-1</sup> , 7 min)                                                                                                                                                                                                                             | QqQ      | EI (70eV), transfer line (300 °C), manifold (40 °C), source (265 °C)                                                                                                                                                                                                                             | 69-103       | Intra-day: < 17<br>Inter-day: < 25 | (5)  |
| DEHP                           | PLE (acetone/hexane, 1:1, v/v)                                                                                           | HPLC                                                  | 10 µl                                                                                          | Waters 5 µm Atlantis (dC <sub>18</sub> 150 mm x 2 mm i.d.)                                                                                                     | A (MeOH), B (Water)<br>75% A (kept 5 min) → 100% (in 4 min, kept 2 min) → 75% (1 min, kept 2 min)                                                                                                                                                                                                                                                   | Q        | ESI+, capillary (3.5 kV), source (120 °C), desolvation (350 °C), cone gas (50 L h <sup>-1</sup> ), desolvation gas (250 L h <sup>-1</sup> )                                                                                                                                                      | 99.8         | Intra-day: 4<br>Inter-day: 8       | (6)  |

<sup>a</sup> Abbreviations: ACN: Acetonitrile; AcOEt: Ethyl acetate; ESI: Electrospray ionization; GC: Gas chromatography; HPLC: High Performance Liquid Chromatography; LVI: Large volumen injection; MeOH: Methanol; PLE: Pressurized Liquid Extraction; PTV: Pressure temperature Vaporization; RSD: Relative standard deviation; SLE: Solid-liquid extraction; UHPLC: Ultra high pressure liquid chromatography  
<sup>b</sup> Expressed as Relative Standard Deviation (%).

**Fig. S1** Ratios observed for the main endosulfan transformation products (TPs) in the studied agricultural soils

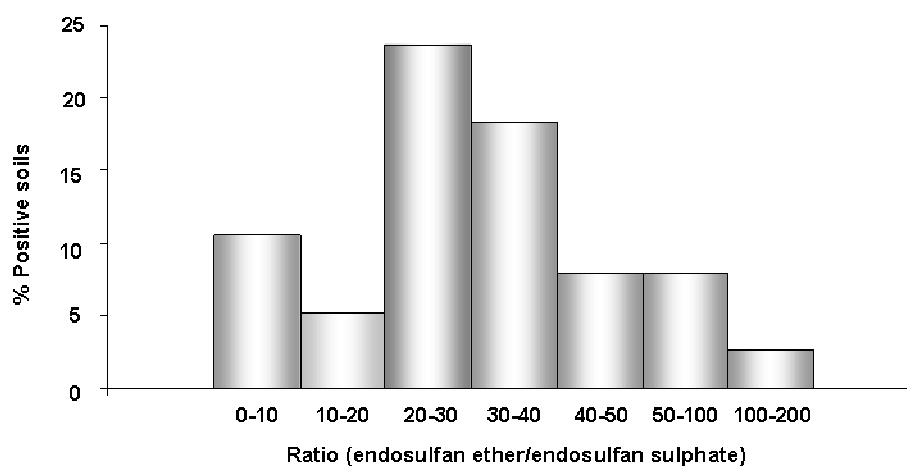

**Fig. S2** Contamination pattern of residues and contaminants studied in the different municipalities: (a) Adra; (b) El Ejido; (c) Roquetas de Mar; (d) La Mojonera; (e) Vicar.

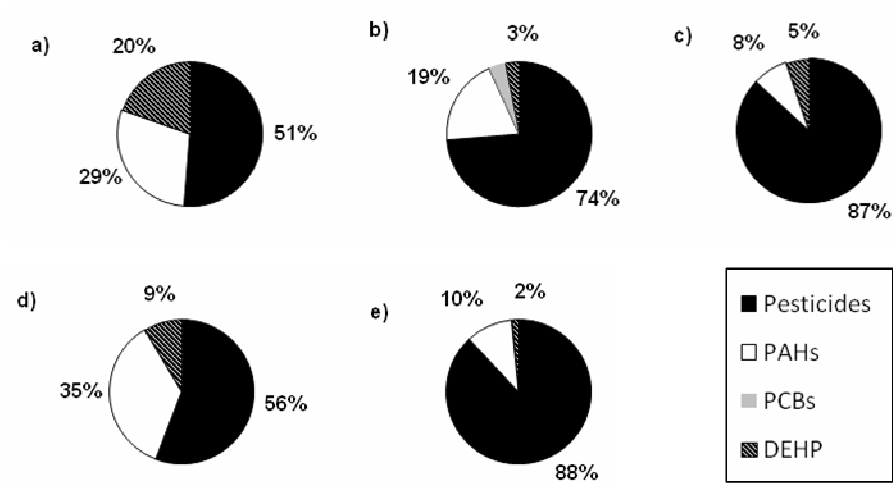

**Apparatus, instruments, solvents and standards used in the different analytical procedures carried out for the agricultural soils analysis.**

*Laboratory apparatus-* Pressurized liquid extraction (PLE) was performed using an ASE 100 accelerated solvent extraction system (Dionex, Sunnyvale, CA, USA) equipped with 34-mL stainless steel extraction cells. An analytical balance AB204-S from Mettler Toledo (Greifensee, Switzerland) and a rotary evaporator R-114 (Büchi, Flawil, Switzerland) were used during extraction and standards preparation. A Reax-2 rotary agitator from Heidolph (Schwabach, Germany) was used. Centrifugations were performed in a high-volume centrifuge from Centronic (Barcelona, Spain).

*Analytical instruments-* Chromatographic analyses were carried out using a GC system Varian 3800 (Varian instruments, Sunnyvale, CA, USA), equipped with electronic flow control (EFC) and interfaced to a 1200L triple quadrupole mass spectrometer (QqQ). Samples were injected into an SPI/1079 split/splitless programmed-temperature injector with a Combi Pal (CTC Analytics AG, Zwingen, Switzerland) autosampler using a 100- $\mu$ L syringe. The glass liner was equipped with a plug of Carbofrit (Resteck, Bellefonte, PA, USA). A fused-silica untreated capillary column (2 m  $\times$  0.25 mm i.d.) from Supelco (Bellefonte, PA, USA), was used as pre-column connected to a Factor Four Capillary Column VF-5ms (30 m  $\times$  0.25 mm i.d.  $\times$  0.25  $\mu$ m film thickness) purchased from Varian. The carrier gas was helium (99.9999 %) at a constant flow rate of 1 mL min<sup>-1</sup>. Argon (99.9999 %) was used as collision gas. The mass spectrometer was operated in electron ionization (EI) at 70 eV. The mass spectrometer was calibrated weekly with perfluorotributylamine. Varian Workstation (version 6.9) was used for instrument control and data analysis.

An ultra high pressure liquid chromatograph (UHPLC) Acquity UPLC<sup>TM</sup> system (Waters, Milford, MS, USA) was used and separations were achieved using an Acquity UPLC<sup>TM</sup> BEH C<sub>18</sub> column (100 mm  $\times$  2.1 mm, 1.7  $\mu$ m particle size) from Waters. MS/MS detection was performed using an Acquity TQD QqQ mass spectrometer (Waters, Manchester, UK). The instrument was operated using an electrospray (ESI) source in positive mode. Data acquisition was performed using MassLynx software (version 4.1) with QuanLynx program (Waters).

A high performance liquid chromatography (HPLC) was utilized using an Alliance 2695 equipped with autosampler, degasser and heated column purchased by Waters. HPLC separation was achieved using a 5  $\mu$ m Atlantis dC18 150  $\times$  2.0 mm id column

obtained from Waters. The MS system was a ZQ 2000 single quadrupole from Waters-Micromass (Manchester, UK).

*Solvents.* Several solvents were used for extraction and analysis procedures. Acetone and cyclohexane was purchased from Fluka (Seelze, Germany), *n*-hexane was obtained from J. T. Baker, methanol (MeOH, HPLC grade solvent) was purchased from Sigma (St. Louis, MO, USA), ethyl acetate (EtAc, residue grade analysis) was supplied by Riedel-de-Haën and acetonitrile (AcN) was purchased from Merck (Darmstadt, Germany). Ultrapure water was obtained from a Milli-Q Gradient water system (Millipore, Bedford, MA, USA).

*Standards.*

**Pesticides.** 97 non-polar pesticides and 29 polar pesticides (a total of 126) of different families were analyzed. Pesticide standards were obtained from Dr. Ehrenstorfer GmbH (Augsburg, Germany). The complete list of the 124 pesticides analyzed can be seen in Table-S1. The method applied for the determination of these compounds has been previously developed in our lab and it allows for simultaneous extraction of non-polar and polar pesticides (1) and the analysis method was based on those previously developed for non-polar (2) and polar pesticides (3).

**PAHs and PCBs.** A total of 24 PAHs have been monitored, including low and high molecular mass compounds (also known as light and heavy PAHs). Acenaphthene (ACP), acenaphthylene (ACY), anthracene (ANT), benz[*a*]anthracene (BaA), benzo[*a*]pyrene (BaP), benzo[*b*]fluoranthene (BbFA), benzo[*ghi*]perylene (BghiP), chrysene (CHR), dibenz[*a,h*]anthracene (DBahA), fluoranthene (FA), fluorene (FLR), indeno[1,2,3-*cd*]pyrene (IP), naphthalene (NPH), phenanthrene (PHE), and 2-bromonaphthalene (BNPH) at a concentration of 2 mg L<sup>-1</sup> in methylene chloride were obtained from Supelco (Bellefonte, PA, USA) as well as 5-methylchrysene (MCH, 99.6% purity), benzo[*j*]fluoranthene (BjFA, 98.6% purity), benzo[*k*]fluoranthene (BkFA 99.5% purity), and fluoranthene-d10 (FA d10, 99.2% purity), which was used as internal standard. Dibenz[*a,e*]pyrene (99% purity), dibenz[*a,i*]pyrene (99.9% purity), dibenz[*a,h*]pyrene (99% purity), dibenz[*a,l*]pyrene (99.5% purity), and cyclopenta[*cd*]pyrene (99% purity) were purchased from Dr. Ehrenstorfer GmbH (Augsburg, Germany).

A total of 36 PCBs were monitored in this survey. PCBs standards (5, 11, 18, 28, 29, 31, 44, 47, 52, 66, 77, 81, 101, 105, 114, 118, 121, 123, 126, 128, 136, 137, 138, 143, 153, 156, 157, 167, 169, 170, 180, 185, 189, 194, 206 and 209) were obtained from Dr.



Ehrenstorfer GmbH. Both PAHs and PCBs were extracted and analyzed applying the methodology developed by Martinez Vidal et al (4).

**Phenolic compounds and DEHP.** Phenolic compounds (12 compounds) belonging to different families, such as chlorophenols (CPs), nitrophenols (NTPs), alkylphenols (Aps) and cresols, were studied in this work. 2-chlorophenol (2-CP), 4-chlorophenol (4-CP), 2,4-dichlorophenol (2,4-diCP) 2,4-dimethylphenol, 2-nitrophenol (2-NTP), 4-nitrophenol, 2,4,5-trichlorophenol (2,4,5-triCP), 2,4,6-trichlorophenol (2,4,6-triCP), 4-n-nonylphenol (4-n-NP) and [<sup>13</sup>C<sub>6</sub>]- pentachlorophenol (PCP), used as IS, were supplied by Fluka (Buchs, Switzerland). 3-nitrophenol, 4-chloro-3-methylphenol, 4-tert-octylphenol (4-tertOP) and PCP were purchased from Supelco (Bellefonte, PA, USA). DEHP purity higher than 99%, was obtained from Sigma-Aldrich (Steinheim, Germany). The simultaneous extraction and analysis of phenolic compounds (5) and the procedure for the analysis of DEHP were carried out using methodologies previously developed (6). It must be noticed that, for the analysis of DEHP, the use of plastic materials was avoided as far as possible since it can be found, for instance, in tips, peek tubing and similar labware. Then, glass material was rinsed thoroughly with acetone and heated at 350 °C for 3 h, to reduce phthalate contamination.

### Quality control (IQC)

An internal quality control (IQC) was carried out during the different analysis in order to guarantee that the measurement process was under statistical control. Analyte free agricultural soil samples were obtained from University of Almeria. These samples were checked by our laboratory to ensure the absence of any target compound and they were used for the IQC. The IQC was based on the use of a blank extract, which eliminated false positives caused by a contamination in the extraction procedure or by the presence of a interference; a reagent blank (obtained by performing the whole procedure without sample), which removed any possibility of false positive due to contamination in the instruments or reagents employed; two spiked blank samples with concentrations depending on the compounds analyzed, which were used to assess the extraction efficiency (in terms of recovery); and a calibration curve to check linearity and sensitivity.

In relation to the spiked blank samples used to check the recovery in every batch of samples, concentration was equal to the first or second calibration point and calibration curves were constructed with different concentrations according to the linearity of each

analyte. Consequently, the concentrations used in the IQC spiked samples depend on the group of analytes, but always relatively low concentrations (e.g. 10 µg/kg).

For the analysis of DEHP, the use of plastic material was avoided as far as possible due to an important background noise was observed in the instrument. Then, glass material was rinsed thoroughly with acetone and heated at 350 °C for 3 h, to reduce phthalate contamination.

---

(1) Martínez-Vidal JL, Padilla-Sanchez JA, Plaza-Bolaños P, Garrido-Frenich A, Romero-Gonzalez R. Use of Pressurized Liquid Extraction for the Simultaneous Analysis of 28 Polar and 94 Non-polar Pesticides in Agricultural Soils by GC/QqQ-MS/MS and UPLC/QqQ-MS/MS. *J AOAC Int* 2010;93:1715–1731.

(2) Fernández-Moreno JL, Garrido-Frenich A, Plaza-Bolaños P, Martínez-Vidal JL. Multiresidue method for the analysis of more than 140 pesticide residues in fruits and vegetables by gas chromatography coupled to triple quadrupole mass spectrometry. *J Mass Spectrom* 2008;43:1235–1254.

(3) Pastor Montoro E, Romero-González R, Garrido Frenich A, Hernández Torres ME, Martínez Vidal JL. Fast determination of herbicides in waters by ultra-performance liquid chromatography/tandem mass spectrometry. *Rapid Commun Mass Spectrom* 2007;21:3585–3592.

(4) Martínez-Vidal JL, Garrido-Frenich A, Barco-Bonilla MN, Romero-González R, Padilla-Sánchez JA. Simultaneous extraction of polycyclic aromatic hydrocarbons and polychlorinated biphenyls in agricultural soils by pressurized liquid extraction and determination by gas chromatography coupled to tandem mass spectrometry. *Anal Bioanal Chem* 2009;395:1551–1562.

(5) Padilla-Sánchez JA, Plaza-Bolaños P, Romero-González R, Garrido-Frenich A, Martínez-Vidal JL. Application of a quick, easy, cheap, effective, rugged and safe-based method for the simultaneous extraction of chlorophenols, alkylphenols, nitrophenols and cresols in agricultural soils, analyzed by using gas chromatography–triple quadrupole-mass spectrometry/mass spectrometry. *J Chromatogr A* 2010;1217:5724–5731.

(6) Garrido-Frenich A, Barco-Bonilla MN, López-Martínez JC, Martínez-Vidal JL, Romero-González R. Determination of di-(2-ethylhexyl)phthalate in environmental samples by liquid chromatography coupled with mass spectrometry. *J Sep Sci* 2009;32:1383–1389.
